# Supplementary material
Source: PubMed Central journal article supplement (PMC5579383)
Supplement: EMBJ-36-2626-s001.pdf [file EMBJ-36-2626-s001.pdf]

## **Selective termination of lncRNA transcription promotes epigenetic silencing and cell differentiation**

Leila Touat-Todeschini<sup>1</sup>, Yuichi Shichino<sup>2,10</sup>, Mathieu Dangin<sup>1,10</sup>, Nicolas Thierry-Mieg<sup>3,4</sup>, Benoit Gilquin<sup>5</sup>, Edwige Hiriart<sup>1</sup>, Ravi Sachidanandam<sup>6</sup>, Emeline Lambert<sup>1</sup>, Janine Brettschneider<sup>7</sup>, Michael Reuter<sup>7</sup>, Jan Kadlec<sup>7</sup>, Ramesh Pillai<sup>7,8</sup>, Akira Yamashita<sup>2,9</sup>, Masayuki Yamamoto<sup>2,9</sup>, André Verdel<sup>1</sup>

### **Table of content of the Appendix**

|                        |        |
|------------------------|--------|
| Appendix Table S1..... | Page 2 |
| Appendix Table S2..... | Page 3 |
| Appendix Table S3..... | Page 4 |
| Appendix Table S4..... | Page 5 |
| Appendix Table S5..... | Page 6 |

**Appendix Table 1.** List of RNAs enriched in Mmi1 RNA-IPs.

RNAs enriched at least 2 fold in both RNA-IPs (IP1 and IP2). Newly identified RNAs are in bold. The variations of RNA levels in *mmi1*Δ cells relative to wild-type cells are as follow: (+), at least 2 fold accumulation, (=), less than 2 fold accumulation or reduction.

| Name                             | Fold Enrichment |      |             | variation<br>in<br><i>mmi1</i> Δ | Up-<br>regulated in<br>meiosis | Number<br>of motifs | Density<br>(Motifs/<br>Kb) | Known<br>target |
|----------------------------------|-----------------|------|-------------|----------------------------------|--------------------------------|---------------------|----------------------------|-----------------|
|                                  | IP1             | IP2  | Average     |                                  |                                |                     |                            |                 |
| <i>ssm4</i>                      | 5,7             | 12,8 | <b>9,2</b>  | + (1, 2)                         | Yes                            | 13                  | 6,46                       | Yes             |
| <i>mug45</i>                     | 5,2             | 13,2 | <b>9,2</b>  | + (1, 2)                         | Yes                            | >15                 | 7,03                       | Yes             |
| <b><i>nam1/ SPNCRNA.1459</i></b> | 8               | 9,6  | <b>8,8</b>  | + (2)                            | NA                             | 9                   | 6,04                       | No              |
| <b><i>mcp7</i></b>               | 4,9             | 12,1 | <b>8,5</b>  | = (1, 2)                         | Yes                            | 10                  | 6,42                       | No              |
| <i>rec8</i>                      | 4,3             | 11,9 | <b>8,1</b>  | + (1, 2)                         | Yes                            | >15                 | 7,62                       | Yes             |
| <i>mug8</i>                      | 4,7             | 9,1  | <b>6,9</b>  | + (1, 2)                         | Yes                            | 14                  | 5,61                       | Yes             |
| <b><i>rec25</i></b>              | 3,3             | 9,5  | <b>6,4</b>  | + (2)                            | Yes                            | 6                   | 3,45                       | No              |
| <i>mei4</i>                      | 4,6             | 8    | <b>6,3</b>  | + (1, 2)                         | Yes                            | 11                  | 5,09                       | Yes             |
| <i>mug9</i>                      | 5,2             | 5,8  | <b>5,5</b>  | + (1, 2)                         | Yes                            | 8                   | 11,71                      | Yes             |
| <b><i>rec11</i></b>              | 2,2             | 8,2  | <b>5,2</b>  | + (1, 2)                         | Yes                            | >15                 | 4,15                       | No              |
| <i>mcp5</i>                      | 3,5             | 6,2  | <b>4,9</b>  | + (1, 2)                         | Yes                            | >15                 | 5,77                       | Yes             |
| <i>mug4</i>                      | 3,1             | 6,2  | <b>4,7</b>  | + (1, 2)                         | Yes                            | 11                  | 3,47                       | Yes             |
| <i>mug1</i>                      | 2               | 7,2  | <b>4,6</b>  | + (1, 2)                         | Yes                            | 10                  | 6,05                       | Yes             |
| <i>rep1</i>                      | 4,1             | 4,6  | <b>4,3</b>  | + (1, 2)                         | Yes                            | 12                  | 5,6                        | Yes             |
| <i>mug10</i>                     | 4,6             | 3,6  | <b>4,1</b>  | + (1, 2)                         | Yes                            | 7                   | 5,2                        | Yes             |
| <i>spo5</i>                      | 2,3             | 5,6  | <b>4,01</b> | + (1, 2)                         | Yes                            | 14                  | 6,7                        | Yes             |
| <b><i>nam2/ SPNCRNA.1366</i></b> | 2,4             | 5,4  | <b>3,9</b>  | NA                               | NA                             | 11                  | 4,74                       | No              |
| <i>crs1</i>                      | 3,2             | 4,2  | <b>3,7</b>  | + (1, 2)                         | Yes                            | 8                   | 7,38                       | Yes             |
| <b><i>nam3/ SPNCRNA.1696</i></b> | 2,3             | 4,4  | <b>3,3</b>  | + (2)                            | NA                             | 4                   | 2,28                       | No              |
| <b><i>SPBC1652.01</i></b>        | 2,2             | 3,8  | <b>3,03</b> | + (1, 2)                         | Yes                            | 4                   | 1,65                       | No              |
| <b><i>arp1</i></b>               | 2,4             | 3,4  | <b>2,9</b>  | + (1, 2)                         | Yes                            | 14                  | 7,46                       | No              |
| <i>meu43</i>                     | 2,4             | 2,9  | <b>2,6</b>  | + (1, 2)                         | Yes                            | 8                   | 5,68                       | Yes             |
| <b><i>SPAC5D6.01</i></b>         | 2,2             | 3,1  | <b>2,6</b>  | + (2) *                          | No                             | 2                   | 2,45                       | No              |
| <b><i>meu26</i></b>              | 2,9             | 2,3  | <b>2,6</b>  | + (1, 2)                         | Yes                            | 7                   | 5,64                       | No              |
| <b><i>tht2</i></b>               | 2,8             | 2,3  | <b>2,6</b>  | + (1, 2)                         | Yes                            | 11                  | 3,9                        | No              |
| <i>mug11</i>                     | 2,3             | 2,6  | <b>2,4</b>  | + (1)                            | Yes                            | 6                   | 4,88                       | Yes             |
| <b><i>SPSNRNA.04</i></b>         | 2,5             | 2    | <b>2,3</b>  | + (1)                            | NA                             | 2                   | 2,5                        | No              |

\* Only the 3'UTR of the gene is upregulated

(1) Hiriart et al. 2012

(2) Kilchert et al. 2015

**Appendix Table 2.** List of high confidence targets of Mmi1 predicted by the computational approach.

The listed RNAs have all Minimal Window Size (MWS) from 2 to 8 motifs that are smaller than the corresponding Cut-off Window Size (CWS). See the Methods section for more information.

| Name                 | Number of motifs | RNA variation in <i>mmi1</i> Δ | Up-regulated in meiosis | Known target |
|----------------------|------------------|--------------------------------|-------------------------|--------------|
| <i>meiRNA/nam4</i>   | 8                | +                              | Yes                     | Yes          |
| <i>spo5</i>          | 14               | +                              | Yes                     | Yes          |
| <i>rec8</i>          | >15              | +                              | Yes                     | Yes          |
| <b><i>mcp3</i></b>   | >15              | +                              | Yes                     | No           |
| <i>arp1</i>          | 14               | +                              | Yes                     | Yes          |
| <i>mei4</i>          | 11               | +                              | Yes                     | Yes          |
| <b><i>rec27</i></b>  | 9                | +                              | Yes                     | No           |
| <i>rep1</i>          | 12               | +                              | Yes                     | Yes          |
| <i>mug8</i>          | 14               | +                              | Yes                     | Yes          |
| <i>mug9</i>          | 8                | +                              | Yes                     | Yes          |
| <i>mcp5</i>          | >15              | +                              | Yes                     | Yes          |
| <i>tht2</i>          | 11               | +                              | Yes                     | Yes          |
| <i>mug4</i>          | 11               | +                              | Yes                     | Yes          |
| <i>mcp7</i>          | 10               | =                              | Yes                     | Yes          |
| <i>nam3</i>          | 11               | +                              | NA                      | Yes          |
| <b><i>chs1</i></b>   | 12               | +                              | Yes                     | No           |
| <i>mug45</i>         | >15              | +                              | Yes                     | Yes          |
| <i>nam1</i>          | 9                | +                              | NA                      | Yes          |
| <b><i>vps13b</i></b> | >15              | =                              | No                      | No           |
| <b><i>nam5</i></b>   | 9                | =                              | NA                      | No           |
| <b><i>nam6</i></b>   | 9                | =                              | NA                      | No           |
| <b><i>pst3</i></b>   | >15              | NA                             | NA                      | No           |

**Appendix Table 3.** Data collection and refinement statistics for the structure of Mmi1 YTH domain.

|                                   | Mmi1 native                       | Mmi1 SeMet        |      |                   |
|-----------------------------------|-----------------------------------|-------------------|------|-------------------|
|                                   |                                   | absorption peak   |      | inflection point  |
| <b>Data collection</b>            |                                   |                   |      |                   |
| Space group                       | $P2_1$                            | $P2_1$            |      | $P2_1$            |
| Cell dimensions                   |                                   |                   |      |                   |
| $a, b, c$ (Å)                     | 57.0, 58.3, 94.1                  | 56.9              | 58.4 | 94.1              |
| $\alpha \beta \gamma$ (°)         | 90, 106.6, 90                     | 90, 106.4, 90     |      | 90, 106.4, 90     |
| Resolution (Å)                    | 100-1.45 (1.51-1.45) <sup>a</sup> | 100-1.7 (1.8-1.7) |      | 100-1.8 (1.9-1.8) |
| $R_{\text{merge}}$                | 8.8 (58.1)                        | 12.3 (51.2)       |      | 11.1 (47.1)       |
| $I / \sigma I$                    | 10.7 (2.6)                        | 7.5 (2.1)         |      | 9.3 (2.5)         |
| Completeness (%)                  | 98.1 (96.9)                       | 98.6 (98.3)       |      | 98.4 (97.8)       |
| Redundancy                        | 4.7 (4.7)                         | 3.4 (3.3)         |      | 3.5 (3.5)         |
|                                   |                                   |                   |      |                   |
| <b>Refinement</b>                 |                                   |                   |      |                   |
| Resolution (Å)                    | 45-1.45                           |                   |      |                   |
| No. reflections                   | 97841                             |                   |      |                   |
| $R_{\text{work}}/R_{\text{free}}$ | 17.6/20.6                         |                   |      |                   |
| $B$ -factor                       | 13                                |                   |      |                   |
| R.m.s. deviations                 |                                   |                   |      |                   |
| Bond lengths (Å)                  | 0.006                             |                   |      |                   |
| Bond angles (°)                   | 1.12                              |                   |      |                   |

<sup>a</sup> Values in parentheses are for highest resolution shell.

Appendix Table 4. List of *S. pombe* strains used in this study

| Name    | Genotype                                                                                                           | Figures         | Source      |
|---------|--------------------------------------------------------------------------------------------------------------------|-----------------|-------------|
| SPV8    | <i>h+ leu1-32 ori1 ade6 M216 ura4-D18 imr1R::ura4+</i>                                                             | 1, 3, 4, 5, EV5 | Lab Stock   |
| SPV41   | <i>h-</i>                                                                                                          | 2, EV3, EV4     | Lab Stock   |
| SPV42   | <i>h+</i>                                                                                                          | 2, EV3, EV4     | Lab Stock   |
| SPV49   | <i>h90 ura4-D18</i>                                                                                                | 2, 3, EV3, EV4  | Lab Stock   |
| SPV546  | <i>h+ leu1-32 ori1 ade 6-216 kanMx6-p3nmt1-TAP::mmi1</i>                                                           | 5               | Lab Stock   |
| SPV885  | <i>h+ leu1-32 ori1 ade6 M216 ura4-D18 imr1R::ura4+ dcr1Δ::hph</i>                                                  | 4, EV5          | Lab Stock   |
| SPV915  | <i>h+ leu1-32 ade6-M210 ura4-DS/E Otr::ura4 rrp6Δ::kanMx6</i>                                                      | 3, 4, EV5       | D. Moazed   |
| SPV954  | <i>h+ leu1-32 ori1 ade6-M216 kanMx6-p3nmt1-TAP::mmi1 clr4Δ::hph</i>                                                | 5               | Lab Stock   |
| SPV1307 | <i>h- hphR::mei4</i>                                                                                               | EV4             | Lab Stock   |
| SPV1600 | <i>h90 leu1-32 ade6-M216 ura4 :: fbp1-lacZ</i>                                                                     | EV4             | F. Bachand  |
| JS94    | <i>h90 ade6-M210 leu1 ura4-D18 mmi1::kanR mei4::ura4+</i>                                                          | EV3             | M. Yamamoto |
|         | <i>h90 ade6-M210 leu1 ura4-D18 mmi1::kanR mei4::ura4+ pREP41</i>                                                   | EV3             | M. Yamamoto |
|         | <i>h90 ade6-M210 leu1 ura4-D18 mmi1::kanR mei4::ura4+ pREP41-3HA-byr2</i>                                          | EV3             | M. Yamamoto |
| JV869   | <i>h- mmi1-ts3&lt;&lt;kanr mei4::ura4+ ade6 leu1</i>                                                               | 4, EV5          | M. Yamamoto |
| SPV1733 | <i>h+ leu1-32 ori1 ade6 M216 ura4-D18 imr1R::ura4+ clr4Δ::nat</i>                                                  | 4, EV5          | Lab Stock   |
| SPV1785 | <i>h+ leu1-32 ori1 ade6 M216 ura4-D18 imr1R::ura4+ mei4DSR-GFP-hph</i>                                             | EV3             | Lab Stock   |
| SPV1817 | <i>h+ leu1-32 ori1 ade6 M216 ura4-D18 imr1R::ura4+ mei4DSR-GFP-hph mmi1Δ::nat</i>                                  | EV3             | Lab Stock   |
| SPV1928 | <i>h90 leu1-32 ade6-M216 ura4::fbp1-lacZ rrp6Δ::hph</i>                                                            | EV4             | Lab Stock   |
| SPV2353 | <i>h+ leu1-32 ade6-M210 ura4-DS/E Otr::ura4 dcr1Δ::nat rrp6Δ::hph</i>                                              | 4, EV5          | Lab Stock   |
| SPV2532 | <i>h- mei4Δ::hph mmi1Δ::nat</i>                                                                                    | 3, EV3, EV4     | This study  |
| SPV2704 | <i>h- mmi1-ts3&lt;&lt;kanr mei4::ura4+ ade6 leu1 clr4Δ::hph</i>                                                    | 4, EV5          | This study  |
| SPV2786 | <i>h- mmi1-ts3&lt;&lt;kanr mei4::ura4+ ade6 leu1 dcr1Δ::hph</i>                                                    | 4, EV5          | This study  |
| SPV2890 | <i>h+ leu1-32 ori1 ade6 M216 ura4-D18 imr1R::ura4+ NatR-p3nmt1::mmi1</i>                                           | Fig EV5         | This study  |
| SPV2908 | <i>h+ leu1-32 ura4D18 ou D/SE ade6-M210 cdc25-22 ts</i>                                                            | 5               | P. Bernard  |
| SPV3010 | <i>h+ leu1-32 ura4D18 ou D/SE ade6-M210 cdc25-22 ts mei4Δ::hph</i>                                                 | 5               | This study  |
| SPV3084 | <i>h+ leu1-32 ura4D18 ou D/SE ade6-M210 cdc25-22 ts mei4Δ::hph mmi1Δ::nat</i>                                      | 5               | This study  |
| SPV3556 | <i>h- ade6-210 leu1-32 ura4-DS/E tRNAPhe-otr1 (dh) Bgl2::ura4 oril mei4Δ::hph mmi1Δ::nat</i>                       | EV5             | This study  |
| SPV3697 | <i>h- rrp6::13myc-kanMx6</i>                                                                                       | 4, EV4, EV5     | Lab Stock   |
| SPV3705 | <i>h- mei4Δ::hph mmi1Δ::nat rrp6::13myc-kanMx6</i>                                                                 | 4               | This study  |
| SPV3761 | <i>h+ ura4-D18 imr::ura4+ cid14Δ::nat rrp6::13myc-hph</i>                                                          | EV5             | This study  |
| SPV4001 | <i>h90 leu1-32 ura4-D18 nam1-1</i>                                                                                 | 2, 3, EV3, EV4  | This study  |
| SPV4065 | <i>h+ leu1-32 ori1 ade6-M216 ura4-D18 imr1R::ura4+ mei4Δ(nt828-1554)::GFP-hph mmi1Δ::nat + pJRXL81</i>             | 1, EV2, EV5     | This study  |
| SPV4068 | <i>h+ leu1-32 ori1 ade6-M216 ura4-D18 imr1R::ura4+ mei4Δ(nt828-1554)::GFP-hph mmi1Δ::nat + pJRXL81-mmi1 WT</i>     | 1, EV2, EV5     | This study  |
| SPV4071 | <i>h+ leu1-32 ori1 ade6-M216 ura4-D18 imr1R::ura4+ mei4Δ(nt828-1554)::GFP-hph mmi1Δ::nat + pJRXL81-mmi1N359D</i>   | 1               | This study  |
| SPV4074 | <i>h+ leu1-32 ori1 ade6-M216 ura4-D18 imr1R::ura4+ mei4Δ(nt828-1554)::GFP-hph mmi1Δ::nat + pJRXL81-mmi1H365D</i>   | 1               | This study  |
| SPV4077 | <i>h+ leu1-32 ori1 ade6-M216 ura4-D18 imr1R::ura4+ mei4Δ(nt828-1554)::GFP-hph mmi1Δ::nat + pJRXL81-mmi1W372A</i>   | 1               | This study  |
| SPV4080 | <i>h+ leu1-32 ori1 ade6-M216 ura4-D18 imr1R::ura4+ mei4Δ(nt828-1554)::GFP-hph mmi1Δ::nat + pJRXL81-mmi1K375D</i>   | 1               | This study  |
| SPV4083 | <i>h+ leu1-32 ori1 ade6-M216 ura4-D18 imr1R::ura4+ mei4Δ(nt828-1554)::GFP-hph mmi1Δ::nat + pJRXL81-mmi1Q398A</i>   | 1               | This study  |
| SPV4086 | <i>h+ leu1-32 ori1 ade6-M216 ura4-D18 imr1R::ura4+ mei4Δ(nt828-1554)::GFP-hph mmi1Δ::nat + pJRXL81-mmi1W421A</i>   | 1               | This study  |
| SPV4089 | <i>h+ leu1-32 ori1 ade6-M216 ura4-D18 imr1R::ura4+ mei4Δ(nt828-1554)::GFP-hph mmi1Δ::nat + pJRXL81-mmi1H426D</i>   | 1               | This study  |
| SPV4092 | <i>h+ leu1-32 ori1 ade6-M216 ura4-D18 imr1R::ura4+ mei4Δ(nt828-1554)::GFP-hph mmi1Δ::nat + pJRXL81-mmi1R459D</i>   | 1               | This study  |
| SPV4101 | <i>h+ leu1-32 ori1 ade6-M216 ura4-D18 imr1R::ura4+ mei4Δ(nt828-1554)::GFP-hph mmi1Δ::nat + pJRXL81-mmi1W372D</i>   | 1               | This study  |
| SPV4305 | <i>h+ leu1-32 ori1 ade6-M216 ura4-D18 imr1R::ura4+ mei4Δ(nt828-1554)::GFP-hph mmi1Δ::nat + pJRXL81-YTHΔ</i>        | 1, EV2, EV5     | This study  |
| SPV4394 | <i>h+ leu1-32 ori1 ade6-M216 ura4-D18 imr1R::ura4+ mei4Δ(nt828-1554)::GFP-hph mmi1Δ::nat + pJRXL81-mmi1R351E</i>   | 1, EV2, EV5     | This study  |
| SPV4396 | <i>h+ leu1-32 ori1 ade6-M216 ura4-D18 imr1R::ura4+ mei4Δ(nt828-1554)::GFP-hph mmi1Δ::nat + pJRXL81-mmi1R381E</i>   | 1, EV2, EV5     | This study  |
| SPV4458 | <i>h+ leu1-32 ori1 ade6-M216 ura4-D18 imr1R::ura4+ mei4Δ(nt828-1554)::GFP-hph mmi1Δ::nat nmt81-mmi1FL::ars1</i>    | 2, EV3          | This study  |
| SPV4467 | <i>h+ leu1-32 ori1 ade6-M216 ura4-D18 imr1R::ura4+ mei4Δ(nt828-1554)::GFP-hph mmi1Δ::nat nmt81-mmi1R351E::ars1</i> | 2, EV3          | This study  |
| SPV4470 | <i>h+ leu1-32 ori1 ade6-M216 ura4-D18 imr1R::ura4+ mei4Δ(nt828-1554)::GFP-hph mmi1Δ::nat nmt81-mmi1R381E::ars1</i> | 2, EV3          | This study  |
| SPV4480 | <i>h90 ura4-D18 3xFlag-byr2</i>                                                                                    | 2               | This study  |
| SPV4598 | <i>h90 ura4-D18 nam1-1 3xFlag-byr2</i>                                                                             | 2               | This study  |
| SPV4601 | <i>h90 ura4-D18 nam1-Ttef</i>                                                                                      | 3               | This study  |
| SPV4604 | <i>h90 ura4-D18 nam1-1-Ttef</i>                                                                                    | 3               | This study  |
| SPV4635 | <i>h- ura4-D18 mei4Δ::hph mmi1Δ::nat nam1-Ttef</i>                                                                 | EV4             | This study  |
| SPV4782 | <i>h90 leu1-32 ade6-M216 ura4 :: fbp1-lacZ + pREP1</i>                                                             | EV4             | This study  |
| SPV4783 | <i>h90 leu1-32 ade6-M216 ura4 :: fbp1-lacZ + pREP1-nam1L</i>                                                       | EV4             | This study  |
| SPV4786 | <i>h90 leu1-32 ade6-M216 ura4 :: fbp1-lacZ + pREP1-nam1-1L</i>                                                     | EV4             | This study  |
| SPV4771 | <i>h90 leu1-32 ura4-D18 nam1-1 + pJRXU41</i>                                                                       | 2               | This study  |
| SPV4774 | <i>h90 leu1-32 ura4-D18 nam1-1 + pJRXU41-3HA-byr2</i>                                                              | 2               | This study  |
| SPV5071 | <i>h- ade6-210 leu1-32 ura4-DS/E tRNAPhe-otr1 (dh) Bgl2::ura4 oril mei4Δ::hph mmi1Δ::nat clr4Δ::kan</i>            | EV5             | This study  |
| SPV5095 | <i>h- ade6-210 leu1-32 ura4-DS/E tRNAPhe-otr1 (dh) Bgl2::ura4 oril clr4Δ::kan</i>                                  | EV5             | This study  |
| SPV5098 | <i>h- ade6-210 leu1-32 ura4-DS/E tRNAPhe-otr1 (dh) Bgl2::ura4 oril mei4Δ::hph</i>                                  | EV5             | This study  |

**Appendix Table 5. List of primers used in this study**

| <b>Name</b>                              | <b>Forward Primer</b>         | <b>Revers Primer</b>     |
|------------------------------------------|-------------------------------|--------------------------|
| <b>qPCR primers</b>                      |                               |                          |
| <i>ssm4</i>                              | TGCAAGAGGAAACTCAAAGG          | TTCCTCCTCCACTTGTTTTGA    |
| <i>tub1</i>                              | GTACTGGCCCATACCGTGAT          | CGAATGGAAGACGAGAAAAGC    |
| <i>spo5</i>                              | TTATGGCGTGCTCGTGAATA          | TTCGACTCCAATGGCACATA     |
| <i>rec8</i>                              | GTTGAAGTTGGACGGGATGT          | TTCTACCCTACTCGGCATCG     |
| <i>nam1</i>                              | TCGGCAATTCAACCATAACA          | TGGCTTCATTCCCTTCCTTTG    |
| <i>nam2</i>                              | TCCTGTTTCTTTGGCTTGCT          | GCAATGCGAACGGTAATTTT     |
| <i>nam3</i>                              | GCCGATTGGATTGTAGTCTTT         | GGCTCAAGGGACAGTGATTC     |
| <i>nam5</i>                              | GACGATAAGCAGGAGTTGCGC         | GGACACAGCATGGGTATGGAC    |
| <i>nam6</i>                              | GACGATAAGCAGGAGTTGCGC         | CGGACATAGTATGGATATGGAC   |
| <i>nam5,6,7</i>                          | TGGCTATGATTGGAAGGTTG          | ACATTTCCCAGGACTGCTG      |
| <i>mei4</i>                              | AAAAGCGACCTTCAAGCAAA          | TTGCATCGTTTGAGACTTCG     |
| <i>dg</i>                                | GGATACCGAGACGCAGGATA          | TGGCTTGTTGTACGTTGTTCA    |
| <b>ChIPs figure 3F, EV3E, EV4K and L</b> |                               |                          |
| <i>nam1 region1</i>                      | ACCGAGGCTCAAGTTAAGGA          | CATCAACCAAACGACCCTCA     |
| <i>nam1 region2</i>                      | ACGTTGGGTTGGAGGTTTTG          | AGGGAGCGCTTATCAACCAT     |
| <i>nam1 region3</i>                      | TGGCTTCATTCCCTTCCTTTG         | TCGGCAATTCAACCATAACA     |
| <i>nam1 region4</i>                      | GTTGAATTGCCGACCGTATC          | CAATCACGACGGATCGTACA     |
| <i>nam1 region5</i>                      | CAGTACTTTACGTTCTGATCC         | CATATACGAGTTCCACAAGGAGT  |
| <i>byr2 region6</i>                      | TTTGGCAGCTTCATTTTGGT          | TCCATAAATGCAGGAAAAGTGG   |
| <b>ChIPs figure 3B, EV4B, C and D</b>    |                               |                          |
| <i>nam1 region1</i>                      | ACGTTGGGTTGGAGGTTTTG          | AGGGAGCGCTTATCAACCAT     |
| <i>nam1 region2</i>                      | GTTGAATTGCCGACCGTATC          | CAATCACGACGGATCGTACA     |
| <i>byr2 region3</i>                      | TTTGGCAGCTTCATTTTGGT          | TCCATAAATGCAGGAAAAGTGG   |
| <i>byr2 region4</i>                      | TCATCTTACCGGAACGCG            | AGCGGACACTTCGTTTCTG      |
| <i>byr2 region5</i>                      | TTCCGAATTGGTTTGTCTCTC         | ATGGATTTTTGAAGCGATGG     |
| <i>byr2 region6</i>                      | CGGATTGCTTACAATGTATGG         | CGATATCCCAAAGTCCGAAAT    |
| <i>byr2 region7</i>                      | GCCCTTCTTTTCAAGGCTCT          | GAAAATGGCCTGCATTTGAT     |
| <b>ChIP Figure EV5 G</b>                 |                               |                          |
| <i>dh region 1</i>                       | TCTCGGTTTTTCCCTTGACA          | CTCAATCCGTGGACGTATCA     |
| <i>dh region 2</i>                       | ATGCCCATGTTTCATTCCACT         | CAGCAGTCCTTGGGAAATGT     |
| <i>dh region 3</i>                       | TCACAGTCGTTCTCCAGTAATCA       | TGAACTTTGTCGAAAAAGTCAATC |
| <i>dh region 4</i>                       | CCACCAGACCATTACAAGCA          | CTCGCCTATTTACCGATCCA     |
| <i>dh region 5</i>                       | CGATCGATTTCTCTTGTTTTTC        | TCGCGAACATCAGCATTACT     |
| <b>RT primers</b>                        |                               |                          |
| <i>nam1 RT1</i>                          | GTAAATGATTTAGGTGTCGTCC        |                          |
| <i>nam1 RT2</i>                          | CTGGTTTAAGGTACGAACG           |                          |
| <i>nam5,6,7</i>                          | TTCGTTTGCGCAACTCCTGCT         |                          |
| <i>nam7-L RT1</i>                        | GCCTTTAAATGACCGCACTAA         |                          |
| <i>nam7-L RT2</i>                        | TGCTTGGGCTTAGTCCTTGT          |                          |
| <i>nam7-L RT3</i>                        | ATGCCCATGTTTCATTCCACT         |                          |
| <i>nam5</i>                              | GCATTGGAAGATCACAATTGT         |                          |
| <i>nam6</i>                              | GGATATGGACACAAGCAAC           |                          |
| <i>nam7</i>                              | GCCTTTAAATGACCGCACTAA         |                          |
| <b>Solexa primers</b>                    |                               |                          |
| 5' adaptor BC3                           | CGGGAGCAAGCAGAAGACGGCATAACGA  |                          |
| 5' adaptor BC4                           | CGGTGCCAAGCAGAAGACGGCATAACGA  |                          |
| SOLOLIGO5 RT                             | ACAAGCAGAAGACGGCATAACGANNNNNN |                          |
